1 **Preventable deaths from SARS-CoV-2 in England and Wales: a systematic**  
2 **case series of coroners' reports during the COVID-19 pandemic**

3  
4  
5 *Bethan Swift, MSc<sup>1,2\*</sup>, Carl Heneghan, DPhil<sup>3,4</sup>, Jeffrey K. Aronson, DPhil<sup>3</sup>, David J. Howard,*  
6 *DPhil<sup>4,5</sup>, Georgia C. Richards, DPhil<sup>3,4</sup>*

7  
8 <sup>1</sup>Oxford Endometriosis CaRe Centre, Nuffield Department of Women's and Reproductive  
9 Health, University of Oxford, Oxford OX3 9DU, UK.

10  
11 <sup>2</sup>Wellcome Centre for Human Genetics, University of Oxford, Oxford, OX3 7BN, UK.

12  
13 <sup>3</sup>Centre for Evidence-Based Medicine, Nuffield Department of Primary Care Health Sciences,  
14 University of Oxford, Radcliffe Observatory Quarter, Woodstock Road, Oxford OX2 6GG, UK.

15  
16 <sup>4</sup>Global Centre on Healthcare and Urbanisation, Kellogg College, University of Oxford, 60-62  
17 Banbury Road, Oxford OX2 6PN, UK.

18  
19 <sup>5</sup>Department for Continuing Education, University of Oxford, UK.

20  
21 \*Corresponding author:

22 Bethan Swift, MSc

23 Email: [bethan@well.ox.ac.uk](mailto:bethan@well.ox.ac.uk)

24 Tel: +44 7921527208

25 Affiliations and address: Oxford Endometriosis CaRe Centre, Nuffield Department of Women's  
26 and Reproductive Health, University of Oxford, Oxford OX3 9DU, UK. Wellcome Centre for  
27 Human Genetics, University of Oxford, Oxford OX3 7BN, UK.

28  
29  
30 **Word count: 3110**

34 **Abstract**

35

36 **Objectives** To examine coroners' Prevention of Future Deaths reports (PFDs) to identify deaths  
37 involving SARS-CoV-2 that coroners deemed preventable.

38

39 **Design** Consecutive case series.

40

41 **Setting** England and Wales.

42

43 **Participants** Patients reported in 510 PFDs dated between 01 January 2020 and 28 June 2021,  
44 collected from the UK's Courts and Tribunals Judiciary website using web scraping to create an  
45 openly available database, <https://preventabledeathstracker.net/>.

46

47 **Main outcome measures** Concerns reported by coroners.

48

49 **Public and Patient Involvement** Patients and members of the public were not involved in this  
50 study.

51

52 **Results** SARS-CoV-2 was involved in 23 deaths reported by coroners in PFDs. Twelve deaths  
53 were indirectly related to the COVID-19 pandemic, defined as those that were not medically  
54 caused by SARS-CoV-2, but were associated with mitigation measures. In 11 cases the coroner  
55 explicitly reported that COVID-19 had directly caused death. There was geographical variation  
56 in the reporting of PFDs; most (39%) were written by coroners in the North-West of England.  
57 The coroners raised 56 concerns, problems in communication being the most common (30%),  
58 followed by failure to follow protocols (23%). Organizations in the National Health Service (NHS)  
59 were sent the most PFDs (51%), followed by the Government (26%), but responses to PFDs by  
60 these organizations were poor.

61

62 **Conclusions** PFDs contain a rich source of information on preventable deaths that has  
63 previously been difficult to examine systematically. Our openly available tool  
64 (<https://preventabledeathstracker.net/>) streamlines this process and has identified many  
65 concerns raised by coroners that should be addressed during the Government's inquiry into the  
66 handling of the COVID-19 pandemic, so that mistakes made are less likely to be repeated.

67

68 **Study protocol pre-registration:** <https://osf.io/bfypc/>

69

70

71 **Summary box**

72

73 **What is already known about this subject?**

- 74 • The UK Government has stated that there will be a public inquiry into the handling of the  
75 COVID-19 pandemic, to learn lessons for future pandemics.  
76 • Coroners in England and Wales have a duty to report and communicate information  
77 about the deaths they investigate when the coroner believes that action should be taken  
78 to prevent future deaths.  
79 • These reports, called Prevention of Future Death reports (PFDs), had not yet been  
80 systematically analysed to identify deaths that occurred during the COVID-19 pandemic.  
81

82 **What are the new findings?**

- 83 • We created the Preventable Deaths Database (<https://preventabledeathstracker.net/>)  
84 using web scraping to systematically assess PFDs published on the Courts and Tribunal  
85 Judiciary website.  
86 • Between 01 January 2020 and 28 June 2021, one in 20 (4.5%, n=23) PFDs that were  
87 published by coroners involved SARS-CoV-2.  
88 • Coroners raised many concerns about the care of patients in hospitals, care homes, and  
89 people in the community during the COVID-19 pandemic, which require action to prevent  
90 future deaths.  
91

92 **How might it affect clinical practice in the foreseeable future?**

- 93 • Preventable deaths that occurred during the COVID-19 pandemic should be referred to  
94 the coroner so that an inquest can be performed and a PFD issued, highlighting actions  
95 that could be avoided in improving the handling of future pandemics in both the UK and  
96 elsewhere.  
97 • Our tool, <https://preventabledeathstracker.net/>, can be used by others to examine  
98 preventable deaths in England and Wales, and to identify signals for quality  
99 improvement to reduce avoidable harms in clinical practice.  
100

## 101 **Introduction**

102

103 Over five million deaths worldwide have been attributed to the severe acute respiratory  
104 syndrome due to coronavirus 2 (SARS-CoV-2)<sup>1</sup>; some deaths may have been preventable.

105

106 In England and Wales, causes of deaths are investigated by coroners during an inquest, unless  
107 the death is natural or referred to the criminal court. Under UK regulations, coroners have a duty  
108 to report and communicate information about the deaths that they investigate when they believe  
109 that actions should be taken to prevent similar deaths<sup>2,3,4</sup>. Such reports, previously called Rule  
110 43 reports, are named Prevention of Future Deaths reports or PFDs. Despite these regulations,  
111 there is no formal system in place for auditing or systematically analysing PFDs, so concerns  
112 raised by coroners in such reports may go unrecognized and unreported, reducing the impact of  
113 the PFD system.

114

115 The PFD system has three processes: 1) coroners write PFDs after the inquest and send  
116 reports to those with the power to act; 2) addressees respond to coroners regarding the  
117 concerns raised in PFDs within 56 days; and 3) actions to prevent such deaths are proposed  
118 and ideally implemented. In December 2020, a series was launched in BMJ Evidence Based  
119 Medicine to disseminate PFDs that highlight lessons for clinical practice and policy<sup>5</sup>. Case  
120 reports in the series have identified deaths from ingesting alcohol-based hand sanitizer,  
121 misdiagnosed adverse drug reactions, problems with repeat opioid prescriptions, and fire  
122 hazards from emollient products<sup>6-9</sup>. Case series of PFDs have also been conducted to  
123 investigate preventable deaths from medicines and misused drugs, suicides, cardiovascular  
124 disease, and cycling<sup>10-13</sup>.

125

126 During the COVID-19 pandemic, healthcare professionals in England and Wales called for the  
127 deaths of their colleagues to be reported to coroners and for PFDs to be issued<sup>14,15</sup>. However,  
128 PFDs issued during the COVID-19 pandemic have not been analysed. We therefore aimed to  
129 systematically analyse PFDs in which SARS-CoV-2 was directly or indirectly implicated in a  
130 death.

131

## 132 **Methods**

133

134 We extracted a series of cases from the Courts and Tribunals Judiciary website and analysed  
135 them according to a study protocol that was preregistered on an open repository<sup>16</sup>.

136

## 137 **Data collection**

138 PFDs are published on the Courts and Tribunals Judiciary website<sup>17</sup>. We used web scraping to  
139 systematically collect all published PFDs and created a searchable database, the Preventable  
140 Deaths Database<sup>18</sup>, which can be efficiently updated. The code for the web scraper is openly  
141 available on GitHub and the methods have been previously described<sup>19,20</sup>. The Preventable  
142 Deaths Database contains the case reference number; the date of the report; the name of the

143 deceased; the coroner's name; the coroner's jurisdiction; the category of death (as assigned by  
144 the Chief Coroner's office); to whom the report was sent; and the URL to the Judiciary website.

### 145 **Eligibility of cases**

146 We screened all 510 PFDs in the Preventable Deaths Database, dated from 01 January 2020 to  
147 28 June 2021, for cases that mentioned COVID-19 as a direct or indirect cause of death. Direct  
148 deaths were defined as those that the coroner explicitly attributed to COVID-19 as a cause of  
149 death or were associated with a positive test for COVID-19 within 28 days of death. Indirect  
150 deaths were defined as those that were not medically caused by COVID-19, but where coroners  
151 mentioned that the associated mitigation measures during the COVID-19 pandemic (for  
152 example, missed appointments due to lockdown), had contributed to the death. Cases that did  
153 not mention SARS-CoV-2 or an effect of the COVID-19 pandemic were excluded.

### 154 **Data extraction**

155 For included cases, one study author (BS) manually extracted the following variables into a  
156 predesigned Google Sheet, which was cross-examined by another study author (GCR): the  
157 individuals or organizations to whom reports were sent and who responded; date of death; age;  
158 sex; setting or location of death; medical cause(s) of death; the coroner's conclusion(s) of the  
159 inquest; relevant medical, mental health and social history; substance(s) implicated in the death  
160 and the type of substance(s); and the coroner's concerns. The data available for extraction were  
161 limited by the information reported by coroners in the PFDs.

### 162 **Data analysis**

163 We used descriptive statistics to describe the numbers and types of cases that met the eligibility  
164 criteria for inclusion. The numbers and types of individuals and organizations who received  
165 PFDs were synthesized and response rates to coroners were calculated. A response rate of  
166 100% meant that the individual or organization responded to all published PFDs issued by  
167 coroners. Once all concerns were extracted, one study author (BS) read through all the  
168 concerns and used content analysis to count and classify each concern inductively<sup>21</sup>.

### 169 **Software**

170 We used Tableau to present the coroners' concerns visually and Data Wrapper to  
171 geographically map the number of PFDs reported in each region of England and Wales.

### 172 **Patient and public Involvement**

173 Patients and the public were not involved in this study.

174

### 175 **Results**

176 Figure 1 shows the results of the extraction process. Of 510 PFDs reported on the Judiciary  
177 website between 01 January 2020 and 28 June 2021, 23 (4.5%) were attributed to COVID-19  
178 and deemed preventable by coroners (Table 1).

179 **Table 1:** Summary of 23 deaths involving SARS-CoV-2 as reported in Prevention of Future Death reports in England and Wales between 1  
 180 January 2020 and 28 June 2021, ordered by causes and date of death (created by the authors)

| Age                                 | Sex | Dates      |            |            | Causes of death                                                                                                                                                             | Responses to PFDs                                                                                                                                     |                                                                                |
|-------------------------------------|-----|------------|------------|------------|-----------------------------------------------------------------------------------------------------------------------------------------------------------------------------|-------------------------------------------------------------------------------------------------------------------------------------------------------|--------------------------------------------------------------------------------|
|                                     |     | Death      | Inquest    | Report     |                                                                                                                                                                             | Addressee(s)                                                                                                                                          | Date of reply <sup>‡</sup>                                                     |
| <b>Directly-related to COVID-19</b> |     |            |            |            |                                                                                                                                                                             |                                                                                                                                                       |                                                                                |
| -                                   | M   | 13/04/2020 | 14/04/2020 | 01/12/2020 | 1) Community-acquired pneumonia<br>2) COVID-19<br>3) Dementia, chronic obstructive pulmonary disease, asbestos-related pulmonary fibrosis, pleural plaques, type 2 diabetes | 1) CQC<br>2) Vicarage Residential Care Home<br>3) Public Health England<br>4) NHS England<br>5) Greater Manchester Health and Social Care Partnership | 1) 04/02/2021<br>2) Undated<br>3) 26/01/2021<br>4) 02/03/2021<br>5) 19/02/2021 |
| 86                                  | F   | 17/04/2020 | 03/07/2020 | 11/12/2020 | Natural causes and COVID-19                                                                                                                                                 | Whipps Cross Hospital                                                                                                                                 | Received but not dated                                                         |
| 74                                  | M   | 21/04/2020 | 22/04/2020 | 01/12/2020 | 1) Hypovolemic shock<br>2) End-stage kidney disease<br>3) Polyneuropathy, frailty and COVID-19                                                                              | 1) Department of Health and Social Care<br>2) Royal London Hospital                                                                                   | Not yet received <sup>^</sup>                                                  |
| -                                   | M   | 21/05/2020 | 26/05/2020 | 09/12/2020 | 1) COVID-19 pneumonia<br>2) Right sided neck of femur fracture, hypertension, atrial fibrillation                                                                           | 1) Public Health England<br>2) NHS England                                                                                                            | 1) 11/02/2021<br>2) 09/02/2021                                                 |
| 18                                  | M   | 31/07/2020 | 03/08/2020 | 30/03/2020 | Drowning to which COVID-19 and asthma were contributory                                                                                                                     | 1) Craven District Council<br>2) Yorkshire Dales National Park<br>3) Yorkshire Water                                                                  | Not yet received <sup>^</sup>                                                  |
| -                                   | M   | 07/09/2020 | 07/09/2020 | 24/04/2021 | 1) Bronchopneumonia in combination with COVID-19<br>2) Falls with vertebral fractures, type 2 diabetes mellitus, pulmonary fibrosis, heart failure and epilepsy             | 1) Greater Manchester Health and Social Care Partnership<br>2) NHS England                                                                            | 1) 07/09/21<br>2) 02/07/21                                                     |

|                                       |   |            |            |            |                                                                                                                                                                                     |                                                                                                          |                                                                                       |
|---------------------------------------|---|------------|------------|------------|-------------------------------------------------------------------------------------------------------------------------------------------------------------------------------------|----------------------------------------------------------------------------------------------------------|---------------------------------------------------------------------------------------|
| -                                     | M | 15/11/2020 | 16/11/2020 | 11/06/2021 | 1) Covid 19 Pneumonitis<br>2) Chronic obstructive pulmonary disease, ischaemic heart disease, previous right upper lobe resection for lung adenocarcinoma, type 2 diabetes mellitus | Tameside CCG                                                                                             | 24/06/2021                                                                            |
| 90                                    | M | 28/01/2021 | 08/02/2021 | 23/04/2021 | 1) COVID-19 pneumonia<br>2) Dementia, heart failure, acute on chronic subdural haematoma, fall                                                                                      | Medway Maritime Hospital                                                                                 | 07/06/2021                                                                            |
| -                                     | M | 05/02/2021 | 08/02/2021 | 10/06/2021 | 1) COVID-19 on background of immunomodulatory treatment<br>2) Seborrheic eczema<br>3) Peripheral vascular disease                                                                   | 1) NHS England<br>2) Secretary of State of Health                                                        | Not yet received <sup>^</sup>                                                         |
| -                                     | M | 03/04/2021 | 17/11/2020 | 14/06/2021 | 1) Aspiration pneumonia on a background of a choking incident, COVID-19 pneumonitis<br>2) Alzheimers dementia                                                                       | 1) MHRA<br>2) NHS Stockport CCG                                                                          | 1) 27/07/21<br>2) 06/08/21                                                            |
| -                                     | M | -          | 30/10/2020 | 19/02/2021 | COVID-19 pneumonitis                                                                                                                                                                | 1) Brighton Sussex University NHS Hospital Trust<br>2) West Sussex NHS Hospital Trust<br>3) Medico-Legal | 1) 19/03/2021<br>2) Not yet received <sup>^</sup><br>3) Not yet received <sup>^</sup> |
| <b>Indirectly-related to COVID-19</b> |   |            |            |            |                                                                                                                                                                                     |                                                                                                          |                                                                                       |
| 32                                    | F | 19/03/2020 | 30/03/2020 | 23/11/2020 | 1) Hanging<br>2) Bipolar affective disorder                                                                                                                                         | 1) Sussex Partnership Foundation NHS Trust<br>2) Brighton and Hove City Council                          | 1) 10/02/2021<br>2) 10/02/2021                                                        |
| -                                     | M | 17/04/2020 | 24/04/2020 | 07/12/2020 | Methadone toxicity                                                                                                                                                                  | 1) Public Health England<br>2) Haverhill Pharmacy                                                        | 1) 13/01/2021<br>2) Undated                                                           |
| -                                     | M | 24/04/2020 | 05/05/2020 | 19/11/2020 | Suicide                                                                                                                                                                             | 1) Woolwich Station Medical Centre<br>2) Ministry of Defence                                             | 1) Not received <sup>^</sup><br>2) 16/02/2021                                         |
| -                                     | F | 20/06/2020 | 23/06/2020 | 11/02/2021 | 1) Bronchopneumonia<br>2) Frailty<br>3) Dementia<br>4) Hypertension                                                                                                                 | 1) CQC<br>2) Department of Health and Social Care                                                        | 1) 04/06/2021<br>2) 03/06/2021                                                        |



|    |   |            |            |            |                                                                                                                                                                                               |                                                                                                |                                |
|----|---|------------|------------|------------|-----------------------------------------------------------------------------------------------------------------------------------------------------------------------------------------------|------------------------------------------------------------------------------------------------|--------------------------------|
|    |   |            |            |            | 5) Fractured neck of femur                                                                                                                                                                    |                                                                                                |                                |
| 28 | M | 10/08/2020 | 14/08/2020 | 15/03/2021 | Suicide                                                                                                                                                                                       | Sussex Partnership NHS Foundation Trust                                                        | Not yet received <sup>^</sup>  |
| 76 | F | 28/09/2020 | 03/12/2020 | 16/12/2020 | Atherosclerosis and complete blockage of one artery                                                                                                                                           | 1) NHS Pathways*<br>2) COVID-19 Pandemic Response Service                                      | 10/02/2021                     |
| -  | M | 25/10/2020 | 26/10/2020 | 02/06/2021 | Combined drug toxicology                                                                                                                                                                      | Stockport CCG                                                                                  | 07/07/21                       |
| 77 | M | -          | 08/10/2020 | 02/02/2021 | 1) Advanced dementia<br>2) Fractured neck of femur<br>3) Ischaemic heart disease                                                                                                              | 1) Adult Social Services, Norfolk County Council<br>2) Norfolk and Norwich University Hospital | 1) 11/03/2021<br>2) 09/04/2021 |
| 88 | M | -          | 20/08/2020 | 05/02/2021 | 1) Bronchopneumonia<br>2) Heat stroke<br>3) Dehydration                                                                                                                                       | Care Outlook Ltd                                                                               | 18/04/2021                     |
| -  | M | -          | 11/08/2020 | 07/05/2021 | 1) Small bowel obstruction and perforation<br>2) Ingestion of foreign body                                                                                                                    | Norfolk and Norwich University Hospital NHS Foundation Trust                                   | 23/07/21                       |
| 68 | F | -          | 20/09/2020 | 14/12/2020 | 1) Pneumothorax<br>2) Rib fractures<br>3) Fall<br>4) COPD and IHD                                                                                                                             | West Midlands Ambulance Service                                                                | 08/01/2021                     |
| 87 | M | -          | 08/10/2020 | 07/05/2021 | 1) Urosepsis<br>2) Long term indwelling catheter not changed since October 2019<br>3) Alzheimer's dementia, cerebrovascular accident, chronic kidney disease, bladder cancer, prostate cancer | Lower Clapton Group Practice                                                                   | 24/06/21                       |

181 \*NHS Digital responded on behalf of NHS Pathways and the COVID-19 Pandemic Response Service. <sup>‡</sup>Recipients of PFDs have 56 days from the date of report to  
182 respond to the coroner under Regulation 29 of The Coroners (Investigations) Regulations 2013. <sup>^</sup>replies were still overdue on 18/10/21; however not all replies are  
183 posted on the Judiciary website.  
184 CCG: Clinical Commissioning Group; CQC: Care Quality Commission; COPD: Chronic Obstructive Pulmonary Disease; MHRA: Medicines and Healthcare  
185 products Regulatory Agency; NHS: National Health Service. Deaths directly related were defined as those that the coroner explicitly reported COVID-19 as a  
186 cause of death or a positive test for COVID-19 within 28 days of death. Indirectly related deaths were defined as those that were attributed to mitigation measures  
187 during the COVID-19 pandemic.

188 Most of the deaths (78%; n=18) occurred in men, and the median age at death was 76 years  
189 (IQR: 50–87 years; range: 18–90 years; n=11). The deaths occurred between 13 April 2020  
190 and 03 April 2021, but the date of death was unreported in six cases.

### 191 **Causes of death**

192 Eleven deaths (48%) were directly related to COVID-19, defined as those for which the  
193 coroner explicitly reported COVID-19 as a cause of death or that were associated with a  
194 positive test for COVID-19 within 28 days of death. Risk factors for death from COVID-19  
195 included type 2 diabetes mellitus, kidney disease, hypertension, heart failure, and epilepsy  
196 (Table 1). Pneumonitis co-occurred in 64% of deaths (n=7). One death was attributed to  
197 drowning, to which COVID-19 and asthma contributed. In one-third (36%; n=4) of the direct  
198 deaths, patients contracted COVID-19 as in-patients for other reasons, and another  
199 contracted COVID-19 while a care-home resident. One man's symptoms of COVID-19 were  
200 undiagnosed during a telephone appointment and untreated, resulting in death. In four cases  
201 (36%) it was unclear how the deceased had contracted COVID-19.

202 Twelve deaths (52%) were indirectly related to COVID-19, defined as those that were  
203 attributed to mitigation measures during the pandemic. There were three suicides and two  
204 cases of inappropriate prescription of medications during lockdown. Two deaths occurred  
205 because the deceased refused to go to hospital or a care home, against medical advice,  
206 owing to fears of COVID-19. A further two deaths occurred from complications with medical  
207 devices when medical appointments were cancelled owing to lockdown and inadequate  
208 follow-up; a catheter was not changed in one case, causing urosepsis, and a salivary bypass  
209 tube was accidentally left inside the patient, where it perforated the small bowel. In two  
210 cases, deaths were attributed to undiagnosed medical problems after incorrect diagnoses of  
211 COVID-19 via remote telehealth appointments. One death was due to natural causes,  
212 contributed to by several falls and a fractured neck of femur in a patient with advanced  
213 dementia.

214 The 23 deaths were classified into nine groups by the Chief Coroner's Office; hospital-  
215 related (28%; n=11), community healthcare (18%; n=7), care homes (13%; n=5), other  
216 (13%; n=5), emergency services (10%; n=4), alcohol, drugs of abuse, and medications (8%;  
217 n=3), mental health related (5%; n=2), suicide (3%; n=1), and service personnel related (3%;  
218 n=1).

### 219 **Geographical variation**

220 Twelve coroners across 12 jurisdictions wrote PFDs relating to COVID-19. Most were written  
221 by coroners in the North West of England (39%; n=9), followed by the South East (22%;  
222 n=5) and London (17%; n=4) (Figure 2; Supplementary Table 1). Coroners in the South  
223 West, North East, West Midlands, and Wales did not report any deaths deemed preventable  
224 from COVID-19.

### 225 **Coroners' concerns**

226 The coroners raised 56 individual concerns in the 23 PFDs. We categorized them into 28  
227 groups and five higher-order categories (Figure 3; Supplementary Table 2). Poor  
228 communication was reported in one-third of PFDs, followed by failure to follow protocols

229 (23%), lack of education and training (19%), lack of resources (16%), and safety concerns  
230 (12%).

### 231 1) *Communication*

232

233 Most (42%, n=8) concerns involved poor communication, followed by failure to keep  
234 accurate medical records/care plans (n=5) and failure to consider how the COVID-19  
235 pandemic would affect appointments (n=3).

236 **Example 1:** *An elderly woman residing in a care home, at high risk of falls, became unwell.*  
237 *Her GP remotely diagnosed suspected COVID-19, and she was isolated in her room, with*  
238 *staff observation and sensor mats to ensure her wellbeing. She fell while unobserved and*  
239 *was admitted to hospital with a fractured neck of femur, bronchopneumonia, and possible*  
240 *COVID-19. A test for SARS-COV-2 was negative. She was unfit for surgery, deteriorated,*  
241 *and later died in hospital from bronchopneumonia. The care home had a risk plan that*  
242 *stipulated that she was to be observed during the day in communal areas. However, the*  
243 *home was not staffed to provide one-to-one observation for residents in self-isolation.*

244 The coroner believed that it was unclear how care homes were being advised to safely  
245 manage residents at risk of falls when isolation was required, and the home knew of no  
246 guidance they could follow to manage the risk. Furthermore, restrictions on family visitors  
247 when in hospital presented significant communication problems, which reduced appropriate  
248 support and timely clinical decision making.

### 249 2) *Failure to follow protocols*

250 The failure to regularly monitor/observe the patient was the most common form of failure  
251 (36%; n=4), followed by a general failure to follow protocols, omission of necessary  
252 treatment, and delayed discharge (Figure 3).

253 **Example 2:** *A 28-year-old man with a lifelong history of low mood and depression with*  
254 *suicidal ideation was socially isolated, which was exacerbated when he was furloughed from*  
255 *his job. He had made five or six attempts to kill himself in 2020 alone and came to the*  
256 *attention of an NHS Trust in May 2020. He registered with a GP at around the same time*  
257 *and was assessed by a Mental Health practitioner, who referred him for treatment. The man*  
258 *was aware of the referral and waited for treatment, but unfortunately the referral was lost. He*  
259 *died by suicide at home 2 months later.*

260 The coroner concluded that the Care Programme Approach (CPA), as set out in national  
261 guidance “Refocusing the CPA – Policy and Positive Practical Guidance”, had not been  
262 followed. It was clear at the inquest that staff members were not aware of how matters  
263 should be dealt with and that this depended heavily on geographical location.

### 264 3) *Education and training*

265 The most common concern was poor clinical decision making (30%, n=3), followed by  
266 inappropriate dosage of medication (20%, n=2).

267 **Example 3:** *A man with drug dependency had been receiving support from a Recovery*  
268 *Network and was generally fit, well, and in good spirits. He received a regular prescription*  
269 *for methadone in daily dosage bottles three times a week. During the COVID-19 pandemic*  
270 *this regimen was changed to once every 14 days, giving him access to a much larger*  
271 *quantity of methadone. The deceased was found at home with a very high blood*  
272 *concentration of methadone. There was no evidence that he intended to take his own life. At*  
273 *the start of the pandemic, Public Health England (PHE) guidance was issued that patients*  
274 *taking short-term methadone should be moved to long-term treatment. The doctor who*  
275 *changed the prescription stipulated that the drug must be supplied in single daily dosage*  
276 *bottles, and explanatory letters had been sent to all the pharmacies that supplied opiate*  
277 *replacement therapies to his patients.*

278 The coroner saw evidence that the prescription was not in daily dose bottles and that there  
279 was no measuring jug to enable accurate measurement of doses. The coroner believed that  
280 it was probable that the man had guessed his first dose from the large methadone bottle. If  
281 he had been given his daily dosage bottles, as prescribed, a measuring jug, and instructions  
282 on how to use it, his death might have been prevented.

#### 283 4) Resources

284 Lack of awareness of appropriate protocols and national guidelines was the most common  
285 failure (40%, n=4), followed by understaffing (30%, n=3), a shortage or lack of availability of  
286 medical equipment (20%, n=2), and unclear protocols (10%, n=1).

287 **Example 4:** *A man was admitted to hospital after an accidental fall at home. After surgery*  
288 *for a fractured hip, he developed a chest infection. When fit for discharge, he was moved to*  
289 *several different wards and eventually put in a bay where patients had been exposed to*  
290 *COVID-19. He subsequently tested positive for COVID-19, deteriorated rapidly, and died.*

291 The coroner heard that the decision to move the deceased had been made on interpretation  
292 of guidance from PHE. The Trust changed its policy, and such movements are reportedly no  
293 longer taking place. However, when the PFD was written the guidance from PHE had not  
294 been amended, and it was not known how other Trusts were choosing to interpret the  
295 guidance, potentially putting other vulnerable in-patients at risk of COVID-19. Rapid and  
296 national dissemination of coroner's concerns might have prevented similar errors in other  
297 hospitals.

#### 298 5) Safety

299 Half of the concerns about safety related to facilities (50%, n=3), followed by poor systems  
300 (33%, n=2) and inadequate discharge processes (17%, n=1).

301

302 **Example 5:** *A resident in a care home, who had pulmonary fibrosis, had an unwitnessed fall.*  
303 *He lay on the floor for over 4 hours awaiting an ambulance. Sepsis was diagnosed and it*  
304 *was thought that he had symptoms consistent with COVID-19. He remained at the home*  
305 *until 11 April, became unresponsive, deteriorated rapidly, was moved to palliative care, and*  
306 *died on 13 April 2020.*

307

308 The coroner reported that the care had been of limited quality, notwithstanding the diagnosis  
 309 of COVID-19 and his vulnerability. The care home was unclear if staff had brought COVID-  
 310 19 into the home or if admission of residents from the community who had not being tested  
 311 before admission had caused COVID-19 to enter the home. There was no risk assessment  
 312 in place relating to the admission of new residents, creating an unsafe environment for  
 313 vulnerable people.

314

315

316 **Responses to PFDs**

317 Forty-three unique individuals and organizations received PFDs from coroners (Table 2).  
 318 Most reports were sent to the NHS (51%; n=22), followed by the Government and related  
 319 bodies, other organizations, and professional bodies. Government organizations had the  
 320 highest response rates (64%; n=7), followed by professional bodies (50%; n=2), other  
 321 organizations (50%; n=3), and NHS organizations (45%; n=10). Of the 23 PFDs, nine had a  
 322 100% response rate and ten had no responses on the Judiciary website.

323

324 **Table 2:** Recipients of Prevention of Future Deaths reports involving COVID-19 in England and Wales  
 325 between 1 January 2020 and 28 June 2021 and their response rates (created by the authors)

| Addressee                            | No. of PFDs sent | No. of responses <sup>±</sup> | Response rate (%) |
|--------------------------------------|------------------|-------------------------------|-------------------|
| <b>NHS organizations</b>             | <b>22</b>        | <b>10</b>                     | <b>45%</b>        |
| Trusts                               | 5                | 2                             | 40%               |
| NHS England                          | 4                | 2                             | 50%               |
| NHS Hospitals                        | 4                | 3                             | 75%               |
| CCGs                                 | 3                | 0                             | 0%                |
| Health and Social Care Partnerships  | 2                | 1                             | 50%               |
| NHS Pathways*                        | 1                | 1                             | 100%              |
| Ambulance services                   | 1                | 1                             | 100%              |
| GPs                                  | 2                | 0                             | 0%                |
| <b>Government</b>                    | <b>11</b>        | <b>7</b>                      | <b>64%</b>        |
| Public Health England                | 3                | 3                             | 100%              |
| Department of Health and Social Care | 2                | 1                             | 50%               |
| Local authorities                    | 3                | 2                             | 67%               |
| COVID-19 pandemic response service*  | 1                | 1                             | 100%              |
| Secretary of State of Health         | 1                | 0                             | 0%                |
| Ministry of Defence                  | 1                | 0                             | 0%                |
| <b>Professional bodies</b>           | <b>4</b>         | <b>2</b>                      | <b>50%</b>        |
| CQC                                  | 2                | 2                             | 100%              |
| General Pharmaceutical Council       | 1                | 0                             | 0%                |
| MHRA                                 | 1                | 0                             | 0%                |
| <b>Other</b>                         | <b>6</b>         | <b>3</b>                      | <b>50%</b>        |
| Care homes/providers                 | 2                | 2                             | 100%              |

|               |   |   |      |
|---------------|---|---|------|
| Water board   | 1 | 0 | 0%   |
| National Park | 1 | 0 | 0%   |
| Legal         | 1 | 0 | 0%   |
| Pharmacy      | 1 | 1 | 100% |

326 \*NHS Digital responded on behalf of NHS Pathways and the COVID-19 Pandemic Response Service  
327 ‡Recipients of PFDs have 56 days from the date of the report to respond to the coroner under  
328 Regulation 29 of The Coroners (Investigations) Regulations 2013  
329 CCG: Clinical Commissioning Group; CQC: Care Quality Commission; GPs: General Practitioners; MHRA:  
330 Medicines and Healthcare products Regulatory Agency; NHS: National Health Service  
331

## 332 Discussion

333 One in 20 PFDs published online involved COVID-19. Most of the deaths occurred in men  
334 and older adults. There was wide geographical variation: no PFDs were reported by  
335 coroners in Wales or in the North East, East Midlands, or South West of England. Coroners  
336 raised several concerns, particularly regarding problems with communication and following  
337 protocols. The largest numbers of PFDs were sent to NHS Trusts and the Government.

338 Eleven deaths were directly caused by SARS-CoV-2. In one-third of these cases, patients  
339 acquired COVID-19 after admission to hospital for an unrelated reason, and another  
340 acquired COVID-19 while in a care home. This suggests that measures to reduce the  
341 transmission of SARS-COV-2 in healthcare settings were not adequate. Healthcare settings  
342 should focus on evidence-based provisions, such as ventilation, personal protective  
343 equipment (PPE), and regular testing to mitigate the risk to vulnerable patients<sup>22</sup>.

344 Twelve deaths were indirectly attributed to the COVID-19 pandemic. This finding highlights  
345 the importance of considering the harms of measures and policies that were implemented to  
346 reduce the transmission of SARS-COV-2 in the community. Reduced social interactions and  
347 changed working conditions or loss of work and income have negatively affected adult  
348 mental health in the UK<sup>23</sup>. Six million patients in the UK did not seek treatment in 2020 (so-  
349 called “missing patients”), owing to reprioritization of healthcare services<sup>24</sup>. In some cases  
350 reduced access to care because of lockdown, despite telemedicine, led to deaths.

351 Healthcare professionals in England and Wales have called for the deaths of their  
352 colleagues to be reported to coroners and for PFDs to be issued<sup>14,15</sup>. However, we did not  
353 identify any PFDs that reported deaths of healthcare professionals.

354 The UK Government has stated that they will begin their public inquiry into the handling of  
355 the COVID-19 pandemic to learn lessons for future pandemics<sup>25</sup>. We have identified several  
356 areas that the Government should address during this inquiry, including poor communication  
357 and gaps in education and training. PFDs should be examined by the Government and  
358 healthcare providers to inform quality improvement and patient safety initiatives.

359 The Office of the Chief Coroner, who is responsible for uploading PFDs to the Courts and  
360 Tribunals Judiciary website, categorized the COVID-19-related PFDs into nine groups,  
361 including hospital-related, community healthcare, and care homes. A new category  
362 specifically for the effects of pandemics should be added to the Judiciary website to assist



363 the Government in examining these case reports so that policy measures can be  
364 implemented for future pandemics.

365 Our study has several limitations. The 23 deaths do not represent all deaths during the  
366 COVID-19 pandemic that could have been prevented in England and Wales. We are also  
367 limited by the information reported by coroners in PFDs. In 52% of PFDs the age of the  
368 deceased was not reported and 26% did not report the date of death. There were also  
369 regions in England and Wales that did not report any PFDs.

370 Under-reporting of PFDs limits the capacity for actions to be taken to prevent future deaths.  
371 However, it is likely that more PFDs relating to COVID-19 will be published, owing to the  
372 backlog of inquests and the time it takes for inquests to conclude and PFDs to be written  
373 and published.

374 There are no clear guidelines in England and Wales for referring deaths to coroners nor for  
375 determining when a PFD should be issued and what information to include, hence the  
376 missing data. There is also no auditing or quality control of PFDs and their responses. Thus,  
377 whether action is taken to prevent such deaths, and the timeliness of such action, is  
378 unknown and unmonitored. In the meantime, we encourage coroners across England and  
379 Wales to continue writing PFDs when they believe that deaths could have been prevented.

380 PFDs contain a rich source of information that can be systematically analysed to share  
381 information on preventing harms. The concerns identified in the 23 PFDs should be  
382 considered during the UK Government's inquiry, including how communication, protocols,  
383 education, training, resources, and patient safety can be improved. Guidelines on how and  
384 when to report deaths to coroners, thresholds for issuing PFDs, and the  
385 necessary mandatory types of information to report in PFDs, including age and date of death,  
386 are needed. Coroners in England and Wales should be encouraged to continue writing  
387 PFDs during the COVID-19 pandemic, particularly when deaths involve frontline healthcare  
388 professionals.

389

## 390 **Declarations**

391

### 392 **Statement of ethical approval**

393 We are using publicly available information, for which ethics committee approval is not  
394 required.

395

### 396 **Funding statement**

397 No grant or research funding was obtained to undertake this study.

398

### 399 **Competing interests statement**

400 BS receives funding from Mustafa Bahceci (Bahceci Health Group, Istanbul, Turkey) for her  
401 Doctor of Philosophy studies at the University of Oxford (2019-2022) and has received  
402 financial remuneration for consultancy work in women's health. CH is a National Institute for  
403 Health Research (NIHR) Senior Investigator and has received expenses and fees for his  
404 media work, received expenses from the WHO, FDA, and holds grant funding from the NIHR  
405 School for Primary Care Research (SPCR) and the NIHR SPCR Evidence Synthesis  
406 Working Group [Project 380], the NIHR BRC Oxford and the WHO. On occasion, CH

407 receives expenses for teaching EBM and is also paid for his GP work in NHS out of hours  
408 (contract with Oxford Health NHS Foundation Trust). JKA has published articles and edited  
409 textbooks on adverse drug reactions and interactions and has often given medicolegal  
410 advice, including appearances as an expert witness in coroners' courts, often dealing with  
411 the adverse effects of opioids and other medicines. DJH is the Director of Studies for  
412 Sustainable Urban Development at the Department for Continuing Education, University of  
413 Oxford. DJH has received financial remuneration for providing political and socioeconomic  
414 country updates for Latin America and the Caribbean for IHS Global. GCR was financially  
415 supported by the NIHR SPCR, the Naji Foundation, and the Rotary Foundation to study for a  
416 Doctor of Philosophy (2017-2021), but no longer has any financial COIs. GCR is an  
417 Associate Editor of BMJ Evidence Based Medicine and is developing  
418 <https://preventabledeathstracker.net/>. The views expressed are those of the authors and not  
419 necessarily those of the NHS, the NIHR, or the Department of Health and Social Care.

420

#### 421 **Contributorship statement**

422 GCR developed the idea for this study, wrote the initial study protocol, ran the python code  
423 to collect the most recent PFDs for screening, contributed to the first draft of the manuscript,  
424 and provided supervisory support. BS contributed to the study protocol, screened the 510  
425 PFDs for their eligibility, extracted the data from the 23 included cases, analysed the data,  
426 and wrote the first draft of the manuscript. CH, JKA, and DJH contributed to the study  
427 protocol, data analysis, and supervision of the project. All authors read, reviewed, and  
428 approved the manuscript before submission.

#### 429 **Data sharing**

430 The data, statistical code, and study materials are openly available via the Open Science  
431 Framework (OSF) and GitHub<sup>16,19</sup>.

432

#### 433 **References**

- 434 1. WHO Coronavirus (COVID-19) Dashboard. *World Health Organization*, 2021.  
435 <https://covid19.who.int>
- 436 2. The Coroners Rules 1984. *Rule 43*.  
437 <http://www.legislation.gov.uk/ukxi/1984/552/article/43/made>.
- 438 3. Coroners and Justice Act 2009.  
439 [https://www.legislation.gov.uk/ukpga/2009/25/pdfs/ukpga\\_20090025\\_en.pdf](https://www.legislation.gov.uk/ukpga/2009/25/pdfs/ukpga_20090025_en.pdf).
- 440 4. The Coroners (Investigations) Regulations 2013.  
441 [http://www.legislation.gov.uk/ukxi/2013/1629/pdfs/ukxi\\_20131629\\_en.pdf](http://www.legislation.gov.uk/ukxi/2013/1629/pdfs/ukxi_20131629_en.pdf).
- 442 5. Richards GC, Aronson JK, Heneghan C. Coroners' concerns to prevent harms: a series  
443 of coroners' case reports to serve patient safety and educate the public, clinicians and  
444 policy-makers. *BMJ Evid Based Med* 2021; 26(2): 37-8.



- 445 6. Richards GC. Alcohol-based hand sanitisers: a warning to mitigate future poisonings  
446 and deaths. *BMJ Evid Based Med* 2021; 26(2): 65-8.
- 447 7. Cox AR, Ferner R. Tramadol: repeated prescriptions and repeated warnings. *BMJ Evid*  
448 *Based Med* 2021 Mar 8; bmjebm-2020-111661.
- 449 8. Richards GC. Preventable opioid-related deaths in England and Wales. (2021)  
450 doi:10.17605/OSF.IO/ECZ4R.
- 451 9. Bilip MK, Richards GC. Emollients and smoking: a fire hazard that could be prevented  
452 to reduce future deaths. *BMJ Evid Based Med* 2021; 26(3): 131-4. .
- 453 10. Ferner RE, Easton C, Cox AR. Deaths from medicines: a systematic analysis of  
454 coroners' Reports to Prevent Future Deaths. *Drug Saf* 2018; 41(1): 103-10.
- 455 11. Richards GC. *et al.* Preventable suicides: a systematic analysis of coroners' prevent  
456 future death reports in England and Wales. (2020) doi:10.17605/OSF.IO/AD4UP
- 457 12. Ains A, Heneghan C, Aronson JK, DeVito NJ, Richards GC. Deaths from cardiovascular  
458 disease involving anticoagulants: a systematic synthesis of coroners' case reports.  
459 *BJGP Open* 2021; BJGPO.2021.0150.
- 460 13. Odgers L, Aronson JK, Richards GC. Preventable deaths involving cyclists in England  
461 and Wales: solutions to improve their safety. *Global Centre on Healthcare and*  
462 *Urbanisation*. [https://www.gchu.org.uk/2021/09/gchu-report-preventable-deaths-](https://www.gchu.org.uk/2021/09/gchu-report-preventable-deaths-involving-cyclists-in-england-and-wales)  
463 *involving-cyclists-in-england-and-wales* (2021).
- 464 14. Kendrick D, Agius R, McKee M, Robertson J, Sewell H, Stewart M. COVID-19: Learning  
465 lessons from the deaths of our colleagues. *BJGP Life* 2020;  
466 <https://bjgplife.com/2020/05/18/gp-deaths/>.
- 467 15. Agius RM. Doctors' deaths from COVID-19 should be reported to the coroner. *BMJ*  
468 2020; 369 m1622.
- 469 16. Swift B, Heneghan C, Aronson JK, Howard D, Richards. Preventable deaths from  
470 SARS-CoV-2 in England and Wales: a systematic analysis of coroners' case reports.  
471 *OSF Registries* 29 June 2021; <https://osf.io/ej6ks>
- 472 17. Judiciary. Prevention of Future Deaths. *Courts and Tribunals Judiciary* 2021;

- 473 <https://www.judiciary.uk/subject/prevention-of-future-deaths/>.
- 474 18. Richards, G.C.Preventable Deaths Tracker. 2021. <https://preventabledeathstracker.net>
- 475 19. [dataset] Richards, G.C. &. DeVito, N.J. Data from: Preventable Deaths Database.
- 476 2021, November 12 2021. [georgiarichards.github.io](https://georgiarichards.github.io) DOI: 10.5281/zenodo.567586620.
- 477
- 478 20. DeVito NJ, Richards GC, Inglesby P. How we learnt to stop worrying and love web
- 479 scraping Nature 2020; 585(7826): 621-2.
- 480 21. Kleinheksel AJ, Rockich-Winston N, Tawfik H, Wyatt TR. Demystifying content analysis.
- 481 *Am J Pharm Educ* 2020; 84(1): 7113.
- 482 22. Richterman A, Meyerowitz EA, Cevik M. Hospital-acquired SARS CoV-2 infection
- 483 lessons for public health. *JAMA* 2020; 324(21): 2155-6.
- 484 23. Abbott A. COVID's mental-health toll: how scientists are tracking a surge in depression.
- 485 *Nature* 2021; 590(7845): 194-5.
- 486 24. The Health Foundation. Unequal pandemic, fairer recovery: The COVID-19 impact
- 487 inquiry report. 2021; <https://reader.health.org.uk/unequal-pandemic-fairer-recovery>.
- 488 25. Booth R. Johnson says public inquiry into Covid will begin this parliament. *The Guardian*
- 489 11 May 2021. [https://www.theguardian.com/world/2021/may/11/boris-johnson-public-](https://www.theguardian.com/world/2021/may/11/boris-johnson-public-inquiry-into-covid-begin-this-parliament)
- 490 [inquiry-into-covid-begin-this-parliament](https://www.theguardian.com/world/2021/may/11/boris-johnson-public-inquiry-into-covid-begin-this-parliament)

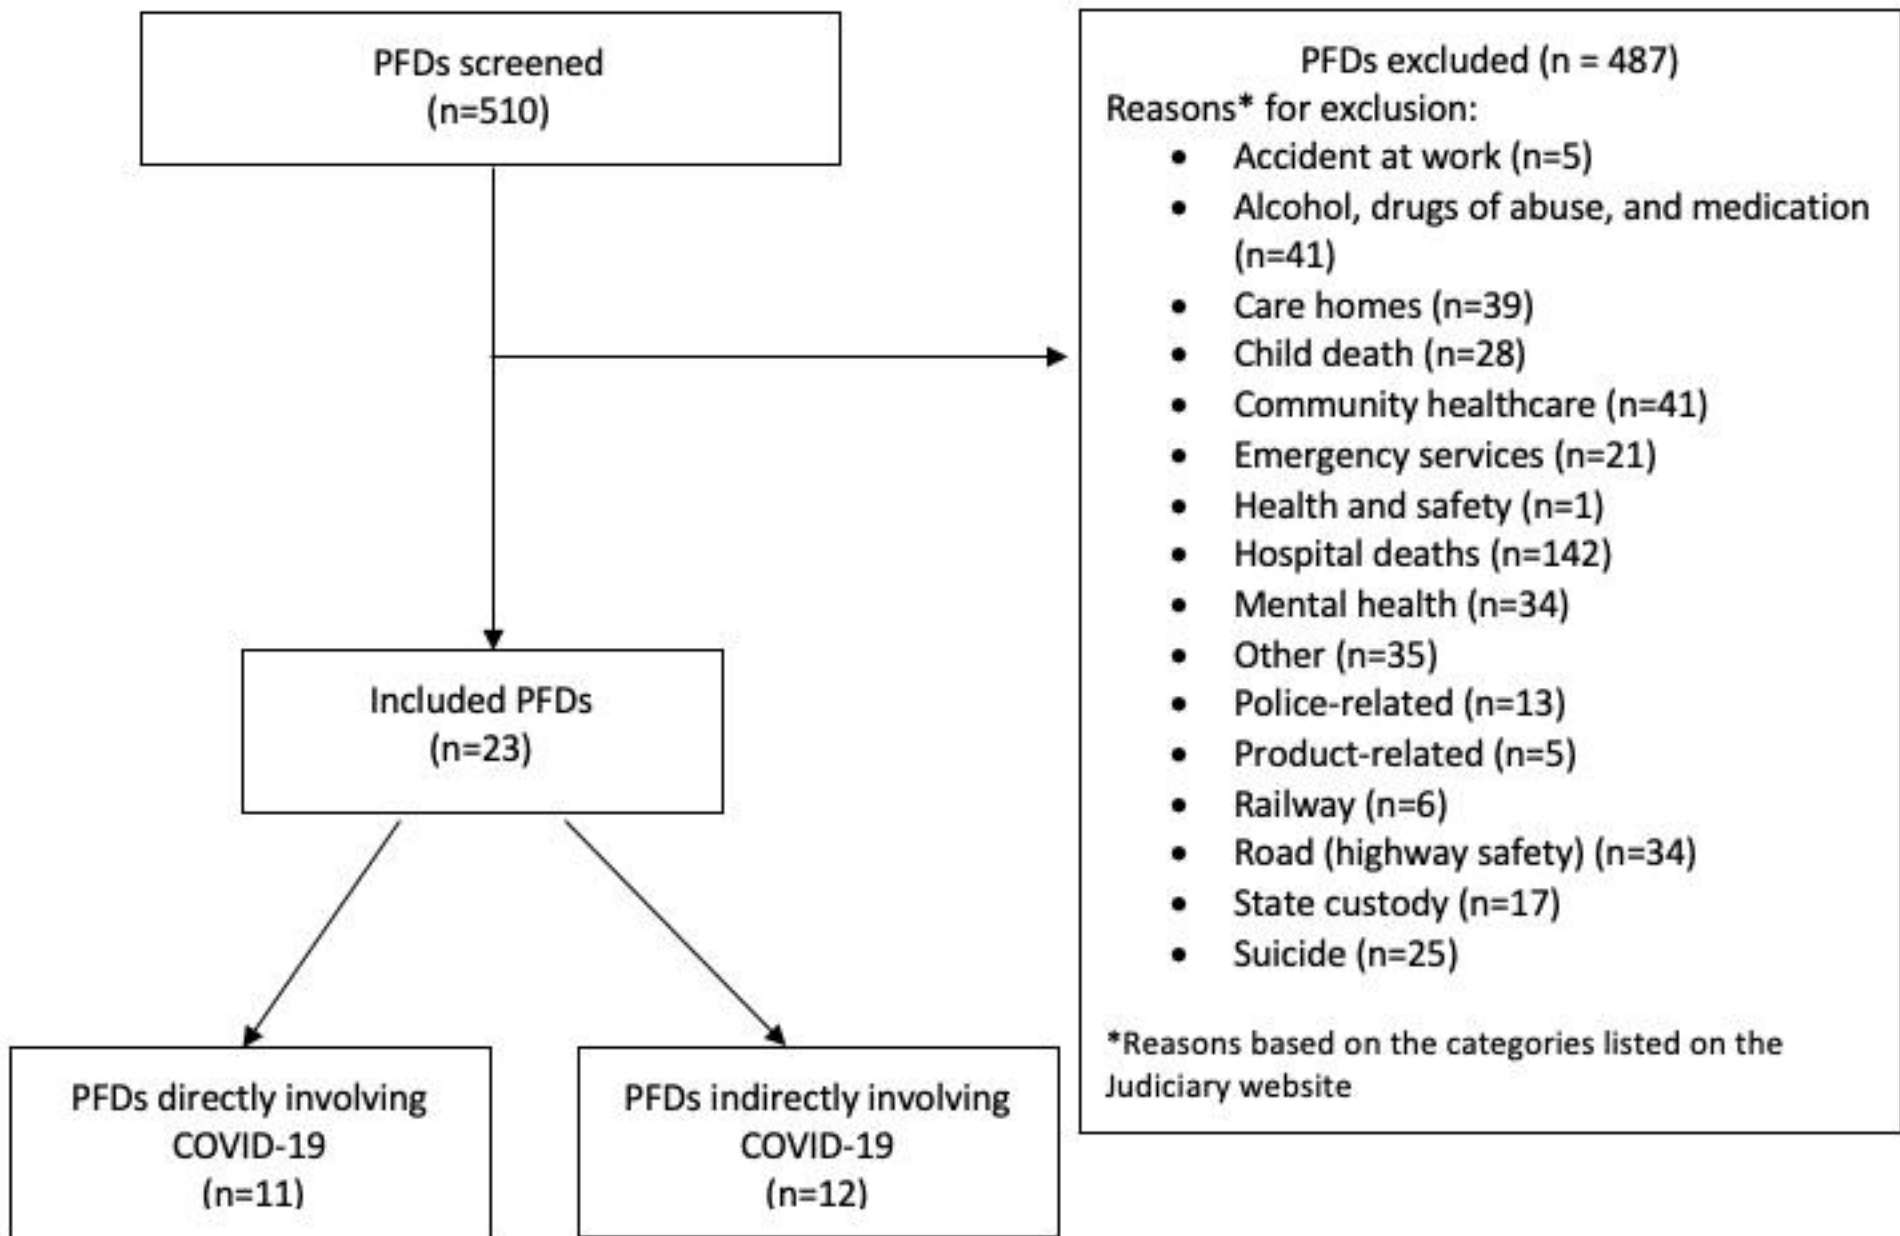

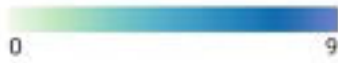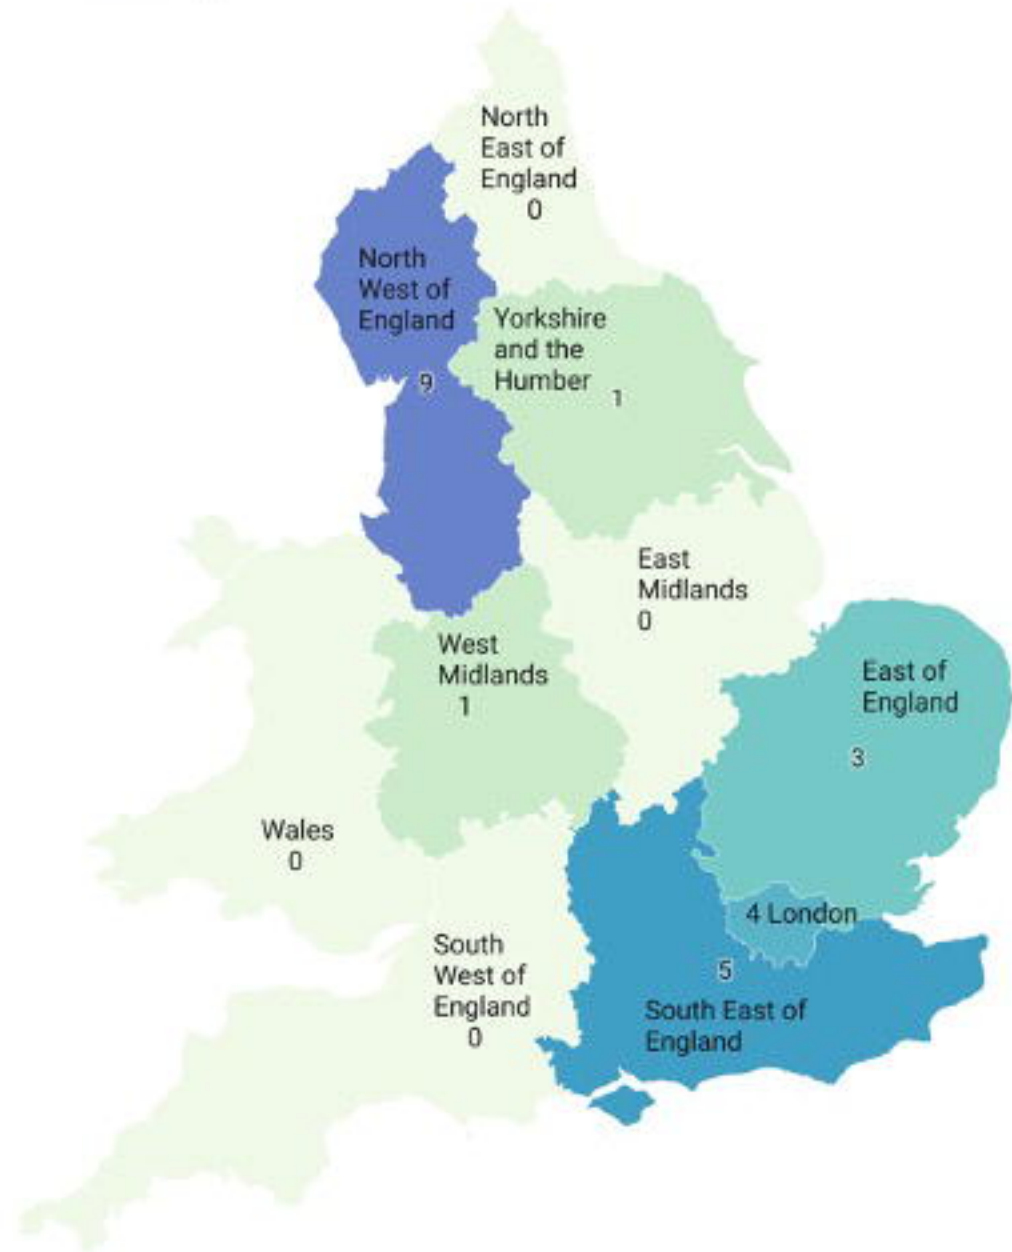



|                                                                        |     |
|------------------------------------------------------------------------|-----|
| Absence/lack of awareness of appropriate protocols/national guidelines | 40% |
| Understaffing                                                          | 30% |
| Shortage/lack of availability of appropriate medical/safety equipment  | 20% |
| Protocols not clear and interpreted wrongly                            | 10% |

|                              |     |
|------------------------------|-----|
| Safety of facilities         | 50% |
| Poor systems                 | 33% |
| Inadequate discharge process | 17% |

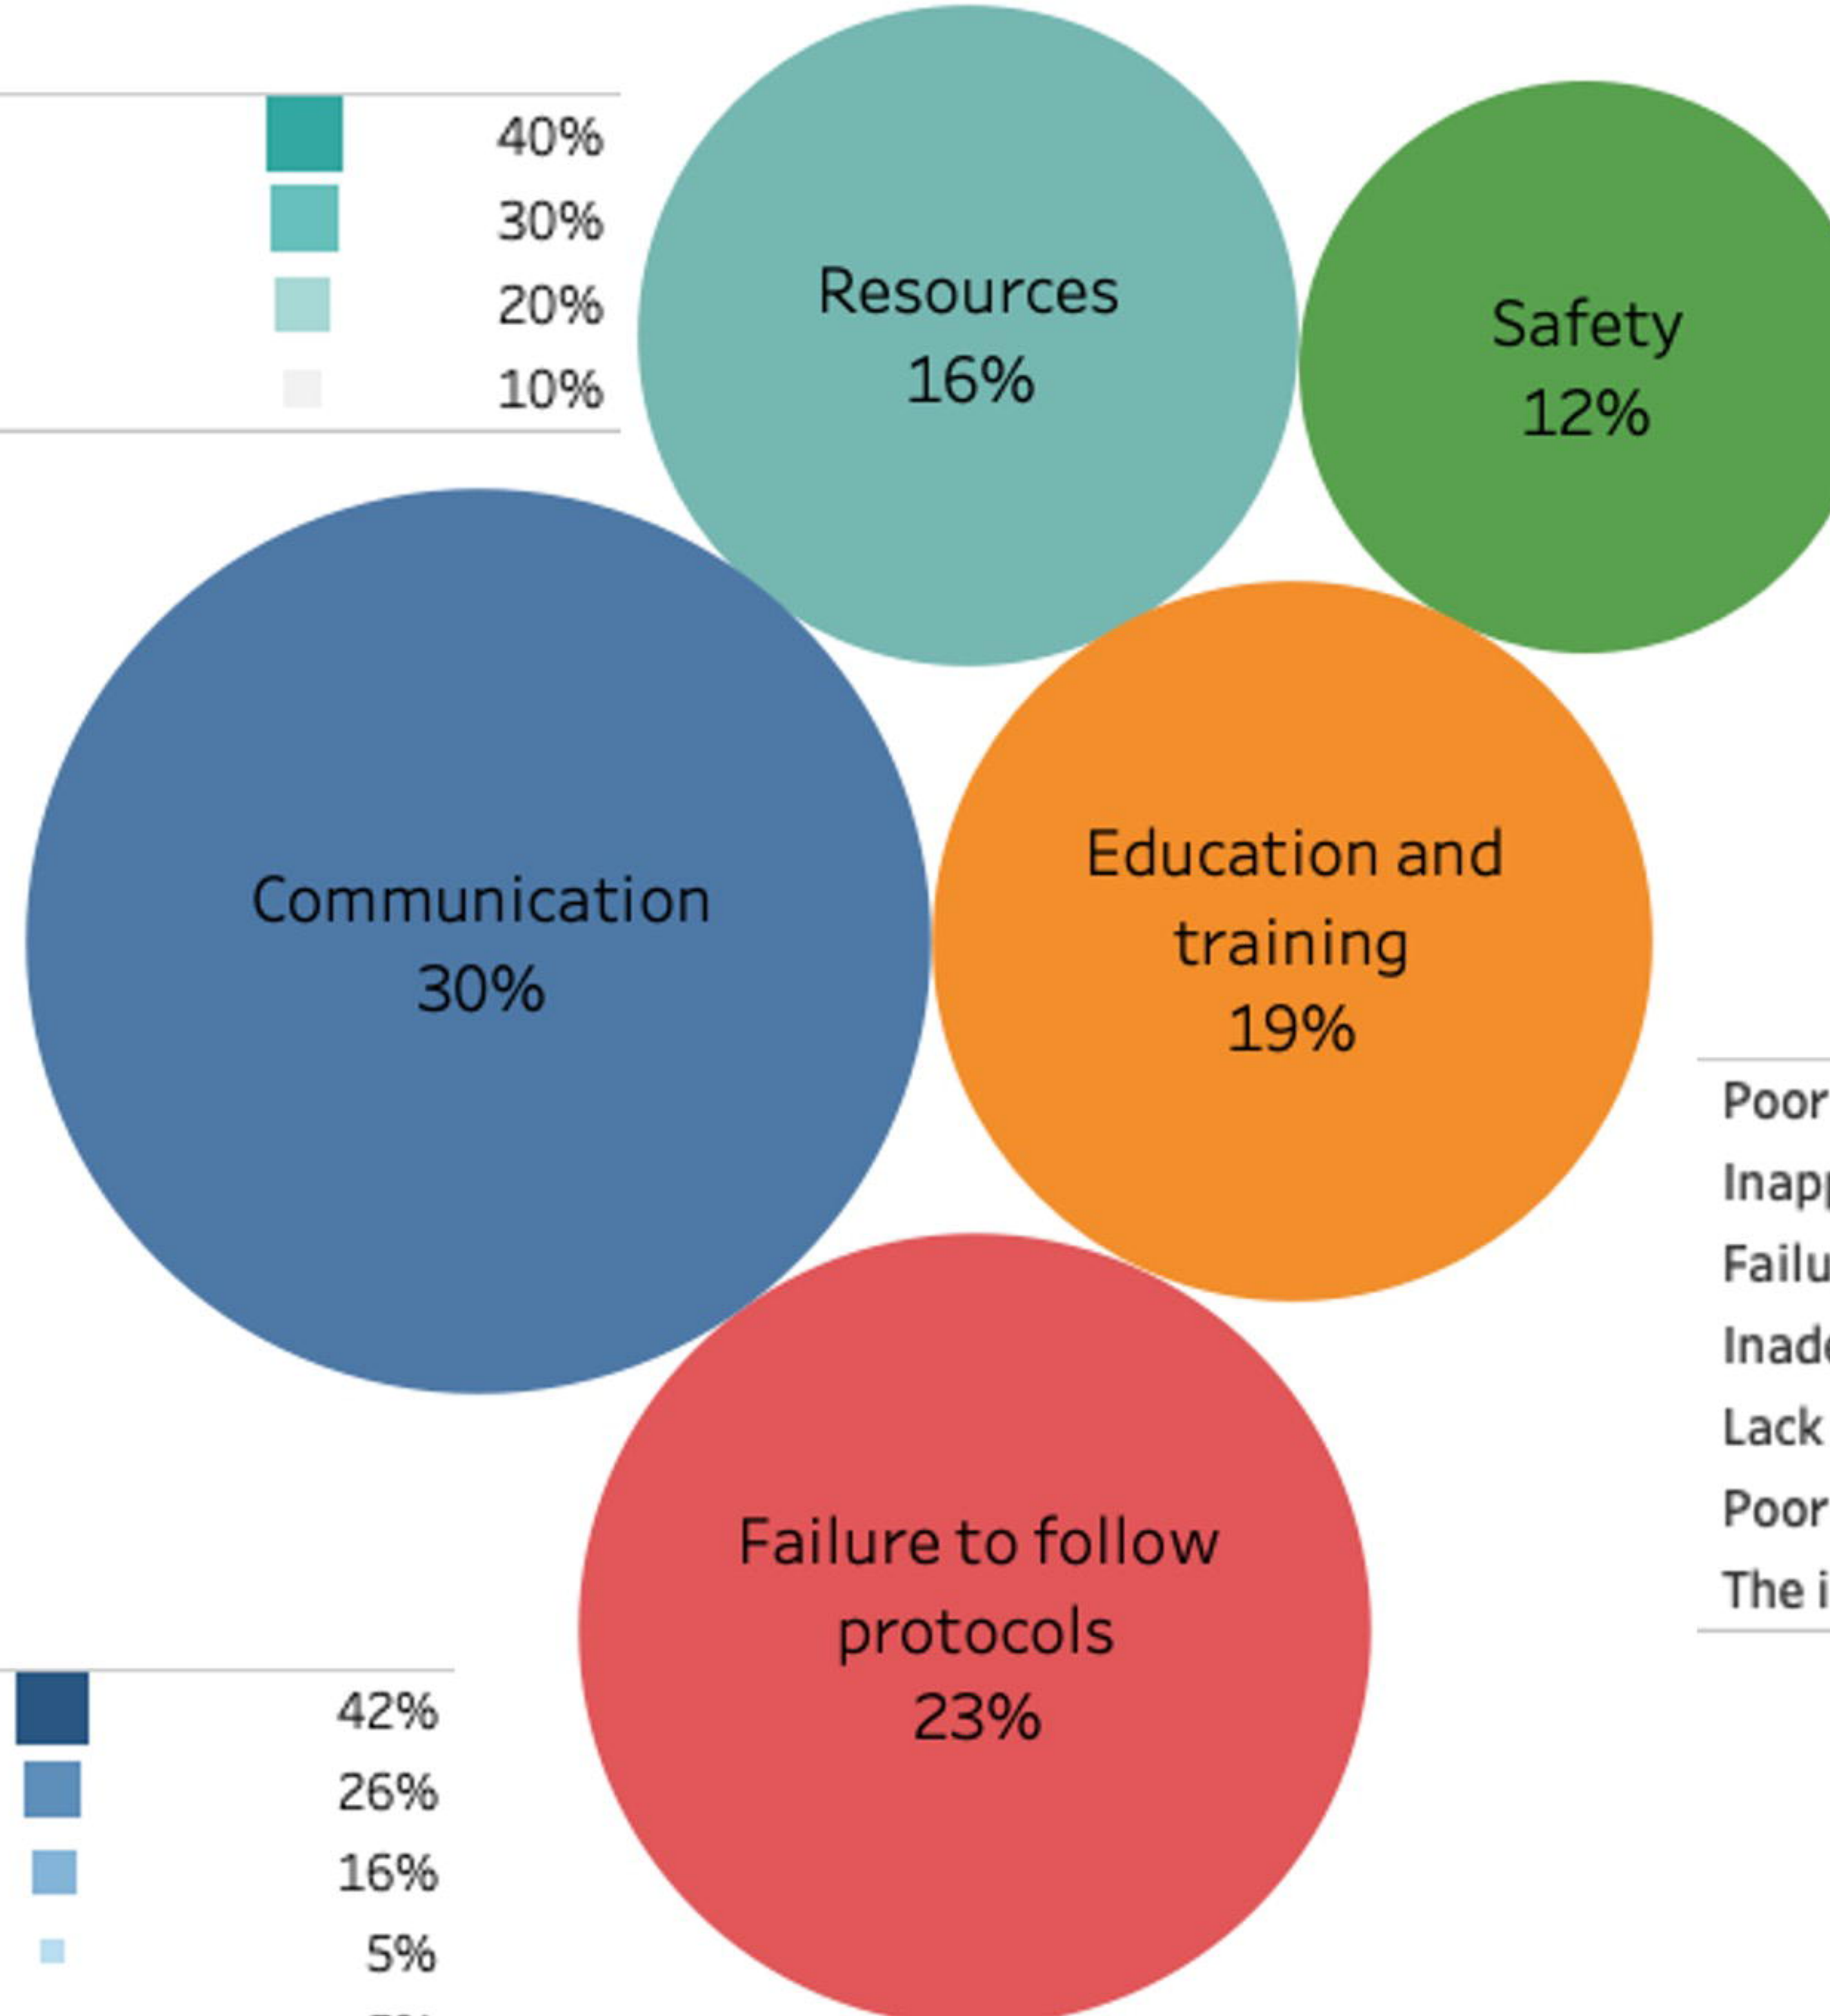

|                                         |     |
|-----------------------------------------|-----|
| Poor clinical decision making           | 30% |
| Inappropriate dosage for the patient    | 20% |
| Failure to appreciate the risk          | 10% |
| Inadequate training                     | 10% |
| Lack of training in drug administration | 10% |
| Poor awareness of symptoms              | 10% |
| The incorrect drug administered         | 10% |

|                                                            |     |
|------------------------------------------------------------|-----|
| Poor communication                                         | 42% |
| Failure to keep accurate medical records/care plans        | 26% |
| Failure to consider how COVID-19 would affect appointments | 16% |
| Failure to follow advice                                   | 5%  |
| Failure to inform family on patient's progress             | 5%  |
| Failure to take informed consent                           | 5%  |

|                                                           |     |
|-----------------------------------------------------------|-----|
| Failure to regularly monitor/observe the patient          | 36% |
| Delayed discharge                                         | 9%  |
| Failure to arrange supervision                            | 9%  |
| Failure to follow a protocol                              | 9%  |
| Failure to review medicines                               | 9%  |
| Failure to triage patients appropriately                  | 9%  |
| Failure/delay in an appropriate assessment of the patient | 9%  |
| Omission of necessary treatment                           | 9%  |
